# Supplementary figures and images for: Application of ALFA-Tagging in the Nematode Model Organisms Caenorhabditis elegans and Pristionchus pacificus
Source: MDPI journal article supplement (doi:10.3390/cells11233875), 2022-12-01

Igreja et al. Figure 4 - source data.

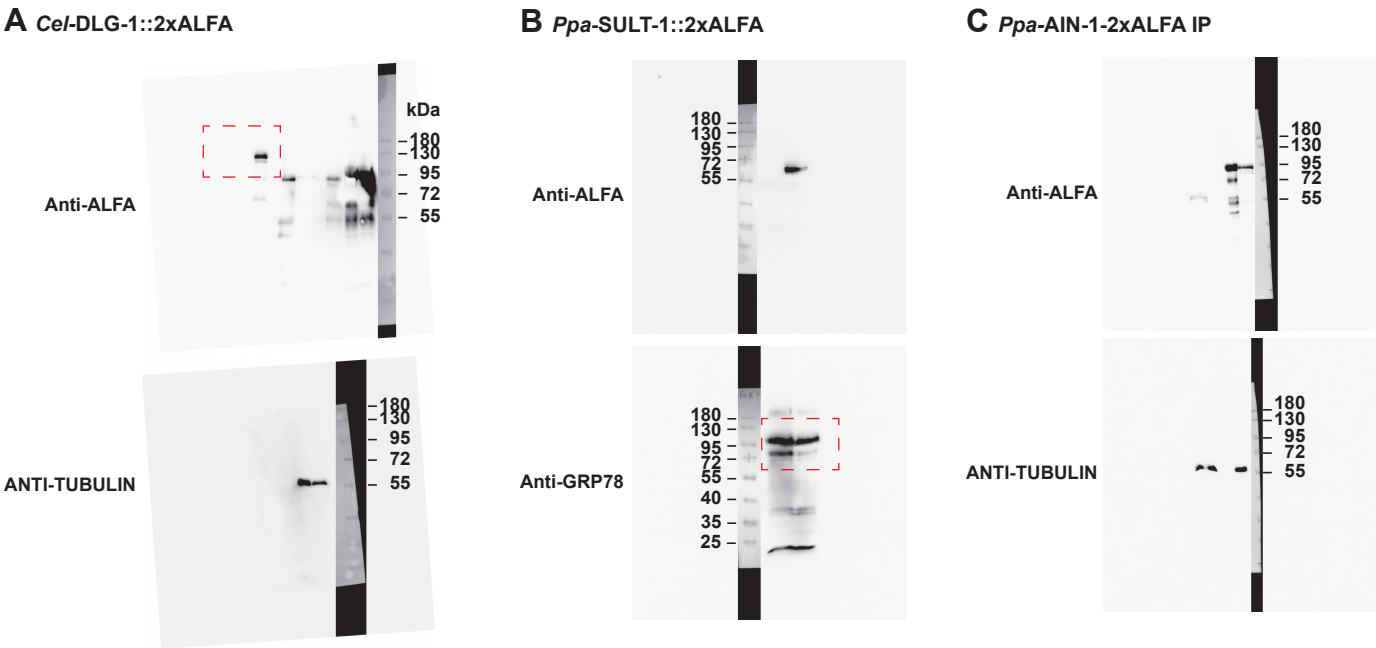

Igreja et al. Supplementary Figure 1 - source data.

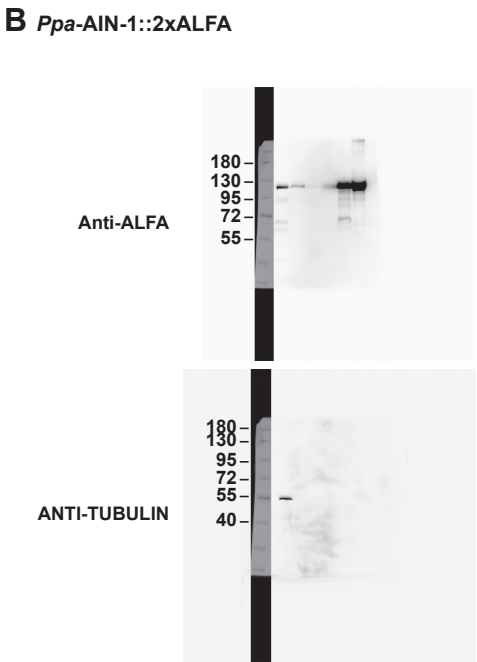

Supplement: s1 [file s1]
